# Supplementary material for: Short-Term Adverse Effects of the Fourth Dose of Vaccination against COVID-19 in Adults over 40 Years of Age
Source: MDPI journal article supplement (doi:10.3390/vaccines12040400), 2024-04-10
Supplement: s1 [file s1]

Table 1 Supplementary: Hazard ratio between the presence of adverse effects from vaccination with the fourth dose against COVID-19 and the variables of interest in adults over 40 years of age in Trujillo, Peru.

|                                                   | HR   | 95% CI      | p-value          |
|---------------------------------------------------|------|-------------|------------------|
| <b>Age (years)</b>                                |      |             |                  |
| <60                                               | Ref. |             |                  |
| ≥60                                               | 0.77 | 0.67 – 0.89 | <b>&lt;0.001</b> |
| <b>Sex</b>                                        |      |             |                  |
| Female                                            | Ref. |             |                  |
| Male                                              | 0.88 | 0.77 – 1.00 | <b>0.060</b>     |
| <b>vaccination scheme</b>                         |      |             |                  |
| Counterpart                                       | Ref. |             |                  |
| heterologous                                      | 1.09 | 0.96 – 1.23 | 0.198            |
| <b>BMI</b>                                        |      |             |                  |
| normal weight                                     | Ref. |             |                  |
| Overweight                                        | 0.96 | 0.82 – 1.13 | 0.636            |
| Obesity                                           | 0.94 | 0.78 – 1.13 | 0.533            |
| <b>Previous infection by COVID-19</b>             |      |             |                  |
| No                                                | Ref. |             |                  |
| Yes                                               | 1.11 | 0.97 – 1.27 | 0.144            |
| <b>Simultaneous vaccination against influenza</b> |      |             |                  |
| No                                                | Ref. |             |                  |
| Yes                                               | 1.20 | 1.04 – 1.40 | <b>0.016</b>     |
| <b>Presence of comorbidities</b>                  |      |             |                  |
| No                                                | Ref. |             |                  |
| Yes                                               | 1.06 | 0.90 – 1.23 | 0.516            |
| <b>Last vaccine</b>                               |      |             |                  |
| mRNA-1273 (Moderna)                               | Ref. |             |                  |
| BNT162b2 (Pfizer-BioNtech)                        | 0.78 | 0.55 – 1.11 | 0.169            |
| <b>Previous BBIBP-CorV</b>                        |      |             |                  |
| No                                                | Ref. |             |                  |
| Yes                                               | 1.14 | 1.01 – 1.30 | <b>0.049</b>     |

HR: Hazard Ratio. CI: confidence interval; Ref: Reference
